# Supplementary material
Source: PubMed Central journal article supplement (PMC5647788)
Supplement: NIHMS912067-supplement-Supporting_Information.pdf [file NIHMS912067-supplement-Supporting_Information.pdf]

*Supporting Information*

**Remote Perturbations in Tertiary Contacts Trigger  
Lysine Ligation to the Heme Iron in Cytochrome *c***

Jie Gu<sup>†</sup>, Dong-Woo Shin<sup>†</sup>, and Ekaterina V. Pletneva\*

Department of Chemistry, Dartmouth College, Hanover, NH 03755

<sup>†</sup>The authors have contributed equally to this work

\*Corresponding author: [ekaterina.pletneva@dartmouth.edu](mailto:ekaterina.pletneva@dartmouth.edu), Tel. 1-603-646-0933, Fax: 1-603-646-3946

**Table S1. pK<sub>a</sub> Values for the Alkaline Transition in Previously Studied Variants of Ferricytochrome *c*<sup>a,1-23</sup>**

| Species             | Variant             | pK <sub>a</sub> <sup>alk</sup> | Reference Protein | ΔpK <sub>a</sub> <sup>b</sup> | Reference |
|---------------------|---------------------|--------------------------------|-------------------|-------------------------------|-----------|
| Horse               | WT (1)              | 9.35                           | --                | --                            | Ref. 1    |
|                     | WT (2)              | 9.22 ± 0.06                    | (1)               | -0.13 ± 0.06                  | Ref. 2    |
|                     | H26N/H33N (3)       | 9.16                           | (1)               | -0.19                         | Ref. 3    |
|                     | E4G/H26N/H33N       | 9.15                           | (3)               | -0.01                         | Ref. 3    |
|                     | K8G/H26N/H33N       | 9.10                           | (3)               | -0.06                         | Ref. 3    |
|                     | K22G/H26N/H33N      | 9.23                           | (3)               | 0.07                          | Ref. 3    |
|                     | K25G/H26N/H33N      | 9.27                           | (3)               | 0.11                          | Ref. 3    |
|                     | H26N/H33N/K39G      | 9.18                           | (3)               | 0.02                          | Ref. 3    |
|                     | H26N/H33N/E62G      | 9.15                           | (3)               | -0.01                         | Ref. 3    |
|                     | H26N/H33N/E66G      | 8.46                           | (3)               | -0.7                          | Ref. 3    |
|                     | H26N/H33N/E66A      | 8.64                           | (3)               | -0.52                         | Ref. 3    |
|                     | H26N/H33N/E69G      | 8.61                           | (3)               | -0.55                         | Ref. 3    |
|                     | H26N/H33N/P76G      | 7.50                           | (3)               | -1.66                         | Ref. 3    |
|                     | H26N/H33N/K72G (4)  | 9.02                           | (3)               | -0.14                         | Ref. 3    |
| H26N/H33N/K72G/K73G | 9.00                | (4)                            | -0.02             | Ref. 3                        |           |
| Horse <sup>c</sup>  | Y67F                | 10.65                          | (1)               | 1.3                           | Ref. 4    |
|                     | A83P                | 8.95                           | (1)               | -0.4                          | Ref. 4    |
|                     | T78N/A83P           | 8.25                           | (1)               | -1.1                          | Ref. 4    |
|                     | T78N                | 8.10                           | (1)               | -1.25                         | Ref. 4    |
| Yeast <i>iso-1</i>  | WT <sup>d</sup> (5) | 8.5                            | --                | --                            | Ref. 5    |
|                     | C102T (6)           | 8.5                            | (5)               | 0                             | Ref. 5    |
|                     | N52I                | 9.4                            | (5)               | 0.9                           | Ref. 6    |
|                     | K72A/C102T (7)      | 8.5                            | (6)               | 0                             | Ref. 7    |
|                     | K73A/C102T          | 8.82 ± 0.02                    | (6)               | 0.32 ± 0.02                   | Ref. 8    |
|                     | K79A/C102T (8)      | 8.44 ± 0.01                    | (6)               | -0.06 ± 0.01                  | Ref. 8    |
|                     | N52G/K79A/C102S     | 7.46 ± 0.02                    | (8)               | -0.98 ± 0.02                  | Ref. 9    |
|                     | L85A/C102T (9)      | 7.7 ± 0.1                      | (6)               | -0.8 ± 0.1                    | Ref. 10   |
|                     | K72A/L85A/C102S     | 7.84 ± 0.06                    | (9)               | 0.14 ± 0.12                   | Ref. 10   |
|                     | F82G/C102T          | 8.4                            | (6)               | -0.1                          | Ref. 5    |

|                    |                         |              |      |              |             |
|--------------------|-------------------------|--------------|------|--------------|-------------|
|                    | F82S/C102T              | 7.7          | (6)  | -0.8         | Ref. 5      |
|                    | F82L/C102T              | 7.2          | (6)  | -1.3         | Ref. 5      |
|                    | F82I/C102T              | 7.2          | (6)  | -1.3         | Ref. 5      |
|                    | F82W/C102T              | 9.95 ± 0.08  | (6)  | 1.45 ± 0.08  | Ref. 11     |
|                    | M80E/C102T              | 11.55 ± 0.11 | (6)  | 3.05 ± 0.11  | Ref. 12     |
|                    | M80D/C102T              | 9.25 ± 0.08  | (6)  | 0.75 ± 0.08  | Ref. 12     |
|                    | P76A/C102T              | 7.83 ± 0.14  | (6)  | -0.67 ± 0.14 | Ref. 13     |
|                    | G77A/C102T (10)         | 8.00 ± 0.23  | (6)  | -0.5 ± 0.23  | Ref. 13     |
|                    | P76A/G77A/C102T         | 6.88 ± 0.15  | (10) | -1.12 ± 0.27 | Ref. 13     |
| Yeast <i>iso-2</i> | WT <sup>d</sup> (11)    | 8.45         | --   | --           | Ref. 14     |
|                    | P76G <sup>d</sup>       | 6.7          | (11) | -1.75        | Ref. 14     |
| Human              | WT                      | 9.9          | --   | --           | Ref. 15     |
|                    | WT                      | 9.5          | --   | --           | Ref. 1      |
|                    | WT                      | 9.3 ± 0.4    | --   | --           | Ref. 16     |
|                    | WT                      | 9.54 ± 0.03  | --   | --           | Ref. 17     |
|                    | WT <sup>f</sup> (12)    | 9.56 ± 0.4   | --   | --           |             |
|                    | Y46F                    | 8.9          | (12) | -0.66 ± 0.4  | Ref. 17     |
|                    | K8R (13)                | 9.63 ± 0.07  | (12) | 0.07 ± 0.41  | Ref. 17     |
|                    | K8R/P44S(14)            | 9.51 ± 0.05  | (13) | -0.12 ± 0.09 | Ref. 17     |
|                    | K8R/P44S/Y46F (15)      | 9.15 ± 0.02  | (14) | -0.36 ± 0.05 | Ref. 17     |
|                    | K8R/P44S/Y46F/S47T (16) | 9.05 ± 0.01  | (15) | -0.1 ± 0.02  | Ref. 17     |
|                    | K8R/P44S/Y46F/S47T/A50E | 9.32 ± 0.03  | (16) | 0.27 ± 0.03  | Ref. 17     |
|                    | Y48E                    | 7.0          | (12) | -2.56 ± 0.4  | Ref. 18     |
|                    | Y48I                    | 6.9          | (12) | -2.66 ± 0.4  | Ref. 18     |
|                    | Y48F                    | 10.3         | (12) | 0.74 ± 0.4   | Ref. 19     |
|                    | G41S                    | 7.8 ± 0.3    | (12) | -1.76 ± 0.5  | Ref. 16     |
|                    | G41A                    | 8.1 ± 0.5    | (12) | -1.46 ± 0.64 | Ref. 16     |
|                    | G41T                    | 6.7 ± 0.2    | (12) | -2.86 ± 0.45 | Ref. 16     |
| Fruit Fly          | WT (17)                 | 9.0          | --   | --           | Ref. 20, 21 |
|                    | P30A                    | 8.2          | (17) | -0.8         | Ref. 21     |
| Rat                | WT                      | 9.5          | --   | --           | Ref. 22, 23 |
|                    | WT                      | 9.6          | --   | --           | Ref. 21     |
|                    | WT (18) <sup>f</sup>    | 9.55 ± 0.05  | --   | --           |             |

|      |      |      |              |             |
|------|------|------|--------------|-------------|
| P30A | 8.5  | (18) | -1.05 ± 0.05 | Ref. 21     |
| P30V | 5.9  | (18) | -3.65 ± 0.05 | Ref. 21     |
| Y67F | 10.7 | (18) | 1.15 ± 0.05  | Ref. 22, 23 |
| N52I | 9.5  | (18) | -0.05 ± 0.05 | Ref. 6      |

<sup>a</sup>The list is not comprehensive, only variants related to reference proteins by a single point mutation are listed. <sup>b</sup> $\Delta pK_a = pK_a^{\text{alk}}$  (variant) –  $pK_a$  (reference protein). <sup>c</sup>Semisynthetic protein prepared by reaction of the synthetic peptide with the cyt *c* fragment after CNBr-treatment. <sup>d</sup>With Cys at position 102. <sup>e</sup>Cys102 modified by treatment with methyl methanethiosulfonate. <sup>f</sup>Average value of multiple values reported for WT (listed above).

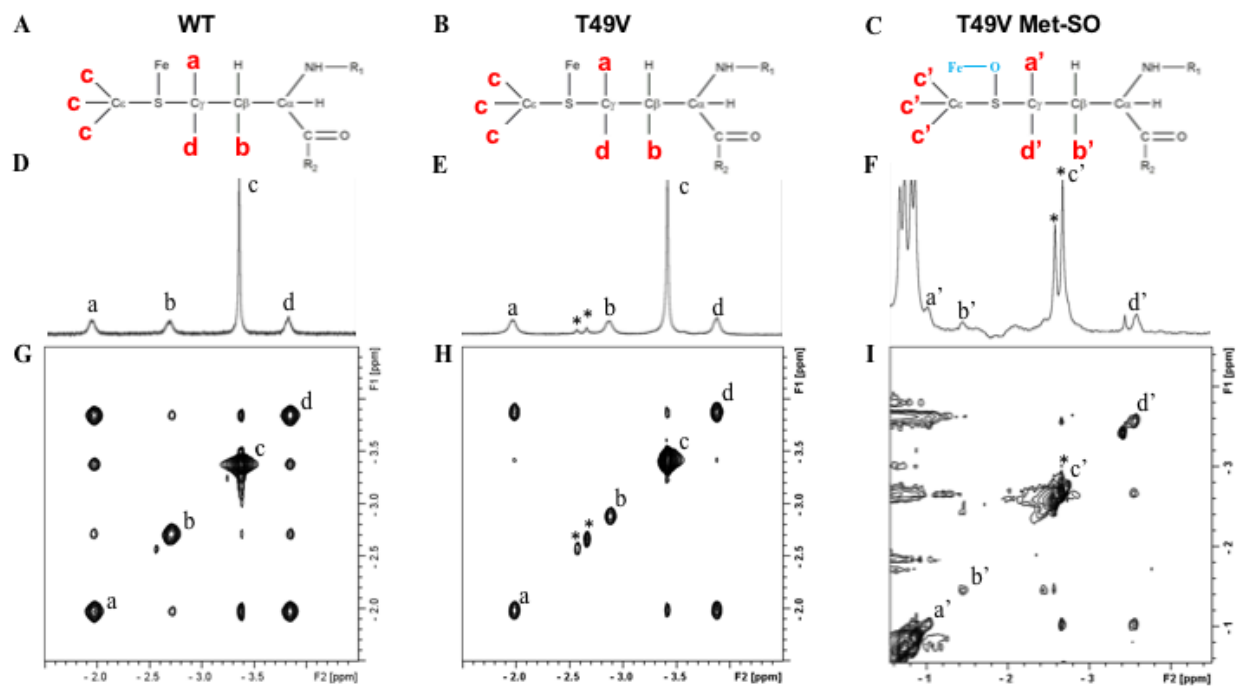

**Figure S1.**  $^1\text{H}$  NMR spectra of ferrous WT, T49V, and T49V Met-SO in a 50 mM sodium phosphate buffer at pH 7.4 and 25 °C. (A)(B)(C) schematic representation of the Met (or Met-SO) ligand (lower case letters representing protons corresponding to labeled peaks in the spectra); (D)(E)(F)  $^1\text{H}$  and (G)(H)(I) 2D  $^1\text{H}$  NOESY NMR spectra for WT, T49V, and T49V Met-SO.

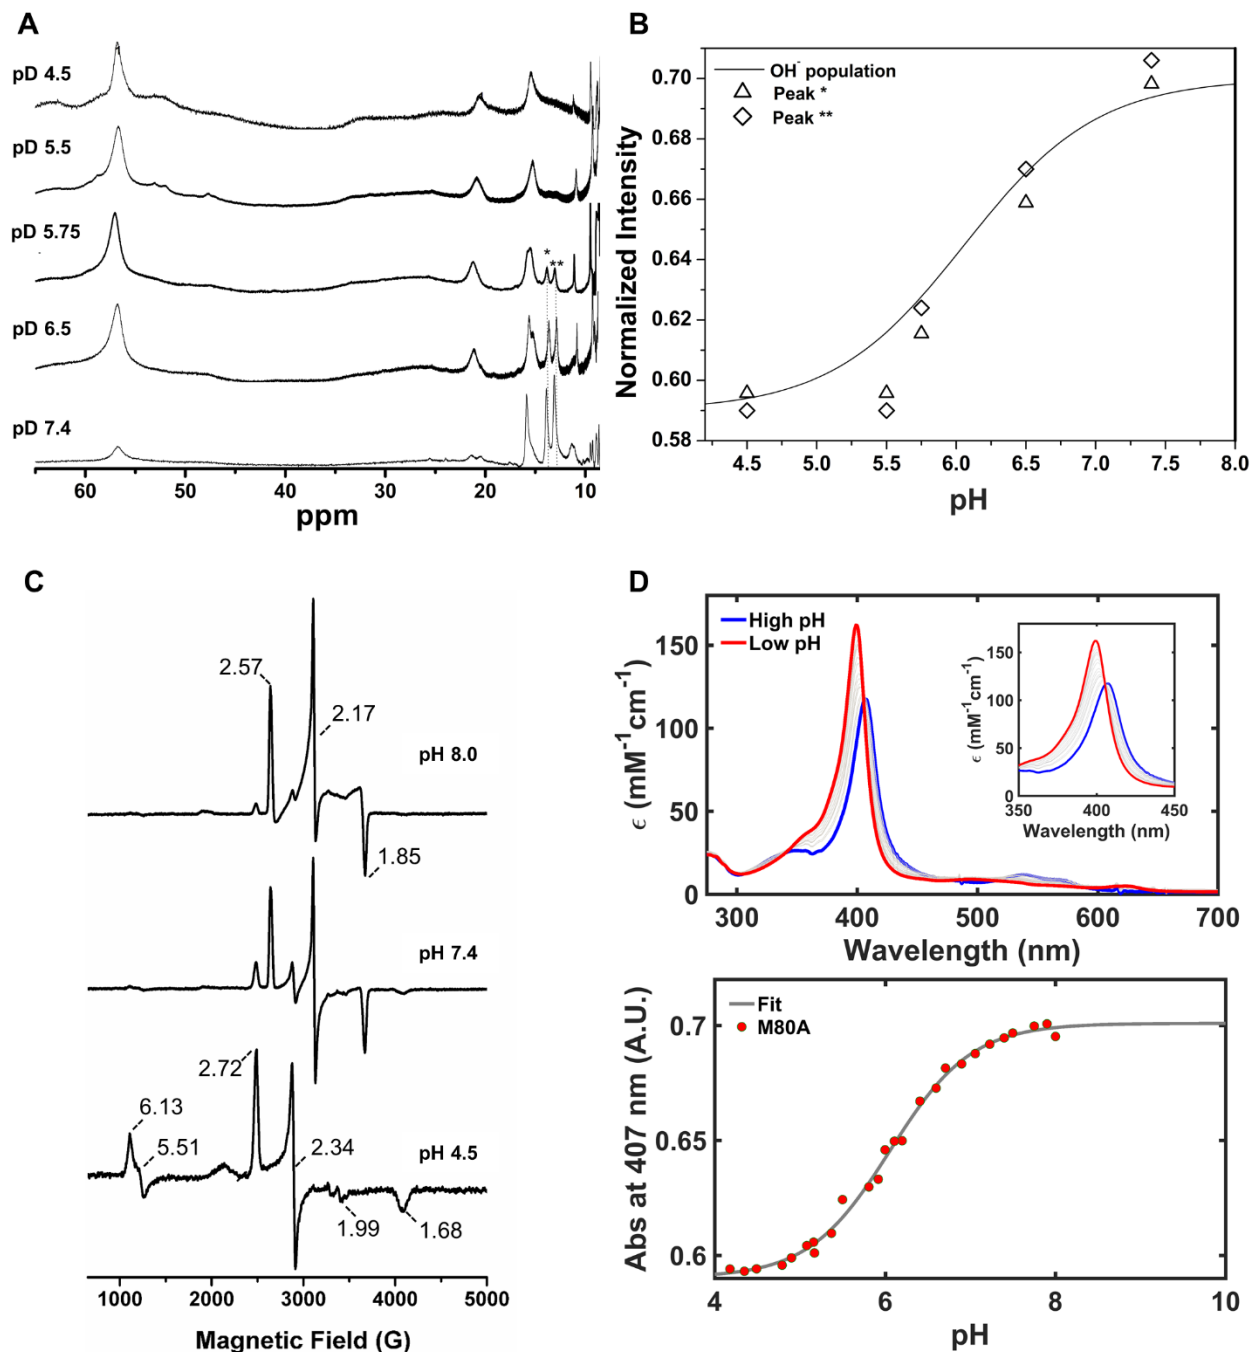

**Figure S2.** Spectra of ferric M80A at different pH values: (A)  $^1\text{H}$  NMR spectra at 25 °C; (B) normalized intensities of the selected NMR peaks, plotted along the fraction of the hydroxide-ligated form of M80A as a function of pH from UV-visible experiments; (C) EPR spectra at 10 K; (D) UV-visible spectra at  $22 \pm 2$  °C (*top*) and fit of the spectral changes (*bottom*).

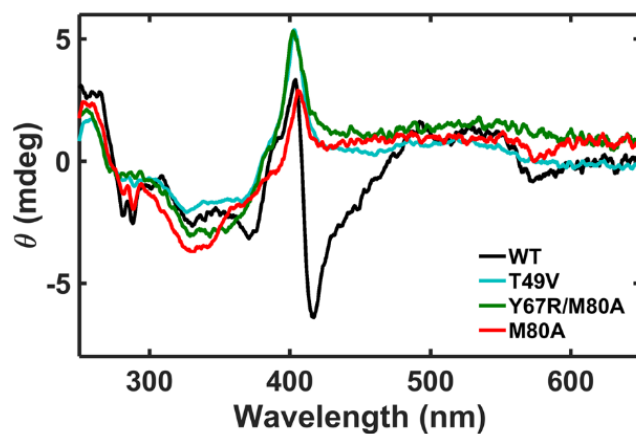

**Figure S3.** Circular dichroism spectra in the Soret region of WT (*black*), T49V (*cyan*), Y67R/M80A (*green*), and M80A (*red*) at pH 7.4 and  $22 \pm 2$  °C. Protein concentrations were 50  $\mu$ M and the path length  $l$  was 2 mm in these experiments.

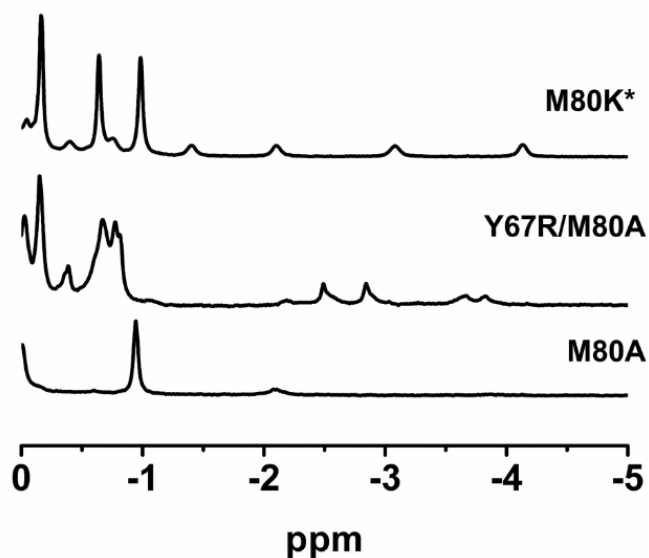

**Figure S4.** Upfield region of the  $^1\text{H}$  NMR spectra of ferrous yeast iso-1-cyt *c* K73A/K79G/M80K, horse heart cyt *c* variants Y67R/M80A and M80A at 25 °C in a 50 mM sodium phosphate buffer at pD 7.4 containing 10%  $\text{D}_2\text{O}$  v/v.

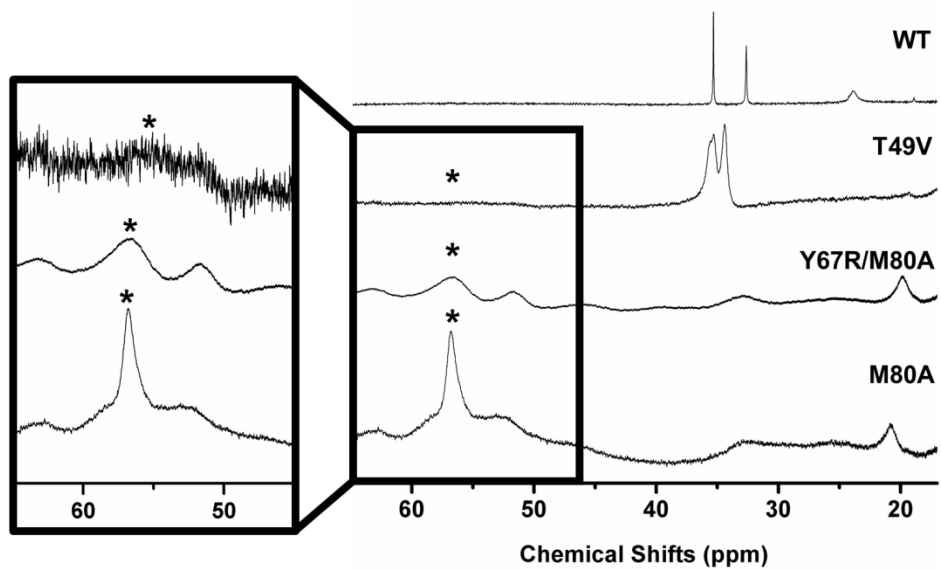

**Figure S5.** <sup>1</sup>H NMR spectra of ferric WT, T49V, Y67R/M80A and M80A variants in a 50 mM sodium acetate (*d*<sub>6</sub>) at pD 4.5 and 25 °C. The signal associated with the high-spin heme iron species is labeled by \*.



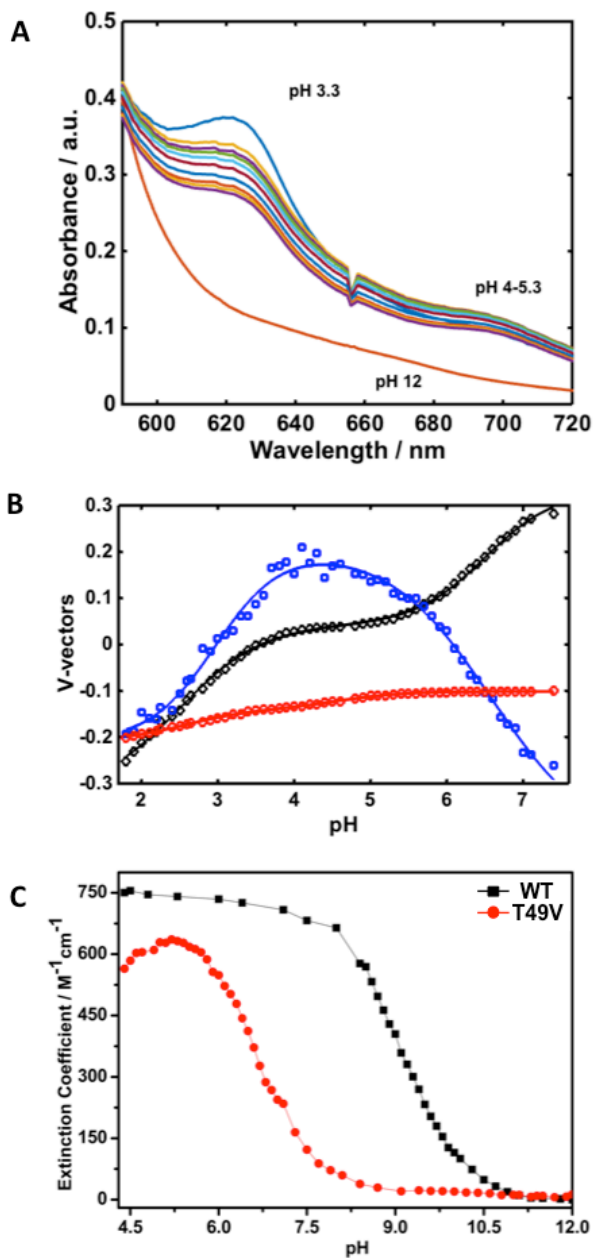

**Figure S6.** (A) pH dependence of the charge-transfer region of the absorption spectra of ferric T49V at  $22 \pm 2$  °C (pH 3.3 to 12.0), (B) plots of the V-vectors (V1 (*blue*), V2 (*black*), and V3 (*red*)) from SVD analysis of these spectra, and (C) pH dependence of the extinction coefficient at 695 nm of ferric WT and T49V.

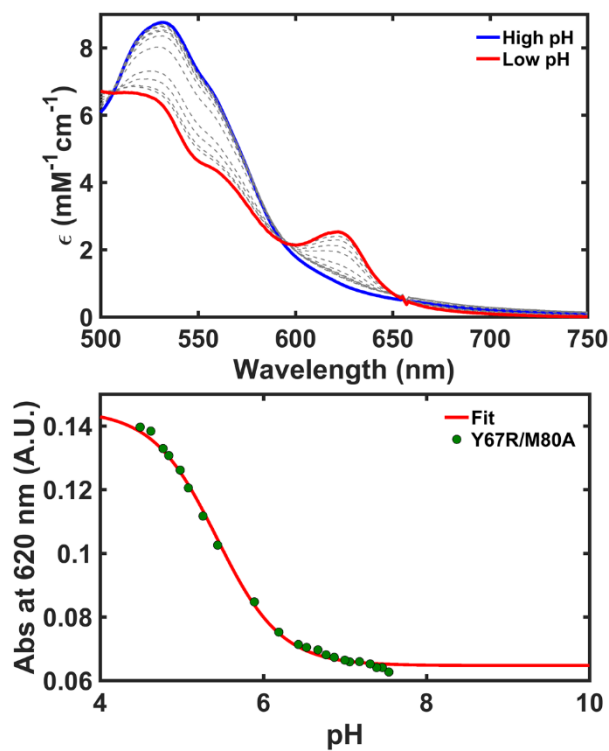

**Figure S7.** (Top) pH dependence of the charge transfer region of Y67R/M80A absorption spectra at  $22 \pm 2$  °C: spectra at high (pH=8.05, *blue*), low (pH=3.94, *red*) pH, and several intermediate (*gray*) pH values are shown. (Bottom) Absorbance values at 620 nm versus pH (*green*) and corresponding fit. Points below pH 4.5 and above 7.5 were omitted from the analysis due to large changes in the spectral baselines suggesting protein denaturation at increasingly acidic and basic conditions.

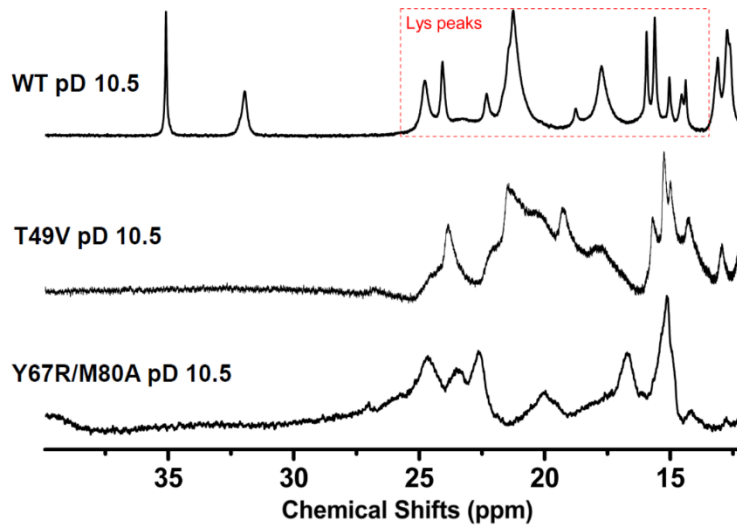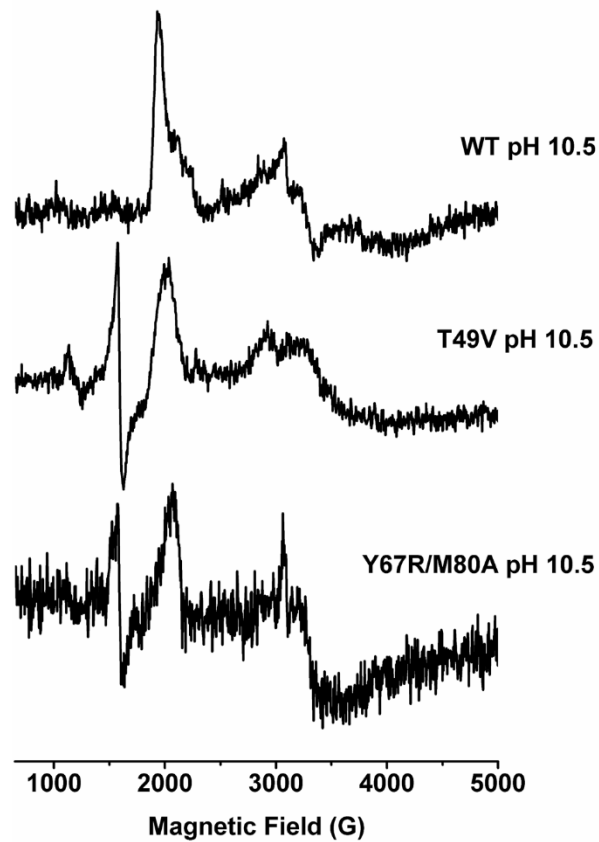

**Figure S8.**  $^1\text{H}$  NMR spectra at 25 °C (*top*) and EPR spectra at 10 K (*bottom*) of ferric WT, T49V, and Y67R/M80A in 50 mM sodium borate buffer at pD (or pH) 10.5. EPR samples contained 20% glycerol v/v.

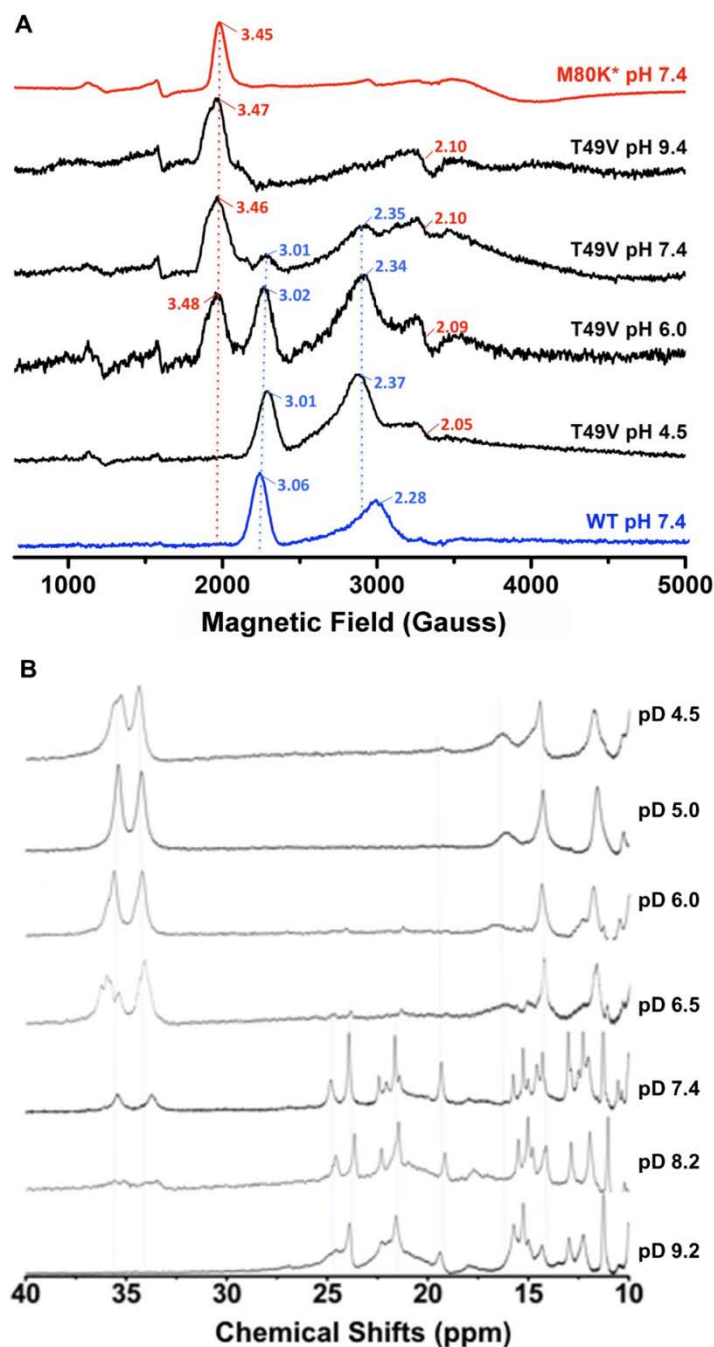

**Figure S9.** (A) EPR spectra of yeast iso-1- K73A/K79G/M80K cyt *c* at pH 7.4; horse heart T49V cyt *c* at pH 9.4, pH 7.4, pH 6.0, and pH 4.5; and horse heart WT cyt *c* at pH 7.4. Each sample contained around 300  $\mu$ M protein in 50 mM borate buffer, pH 9.4; sodium phosphate buffer, pH 7.4; MES buffer, pH 6.0; or sodium acetate buffer, pH 4.5, with 30% v/v glycerol (except for K73A/K79G/M80K). Spectra were obtained at 10 K. Signals attributed to Lys-bound and Met-bound species are labeled in red and blue, respectively. (B) pH dependence of the downfield region of the  $^1\text{H}$  NMR spectra of ferric T49V at 25  $^\circ\text{C}$ . Buffers were 50 mM sodium acetate at pD 4.5-6.0; 50 mM sodium phosphate at pD 6.5-7.4; 50 mM Tris buffer at pD 8.2; and 50 mM sodium borate at pD 9.2.

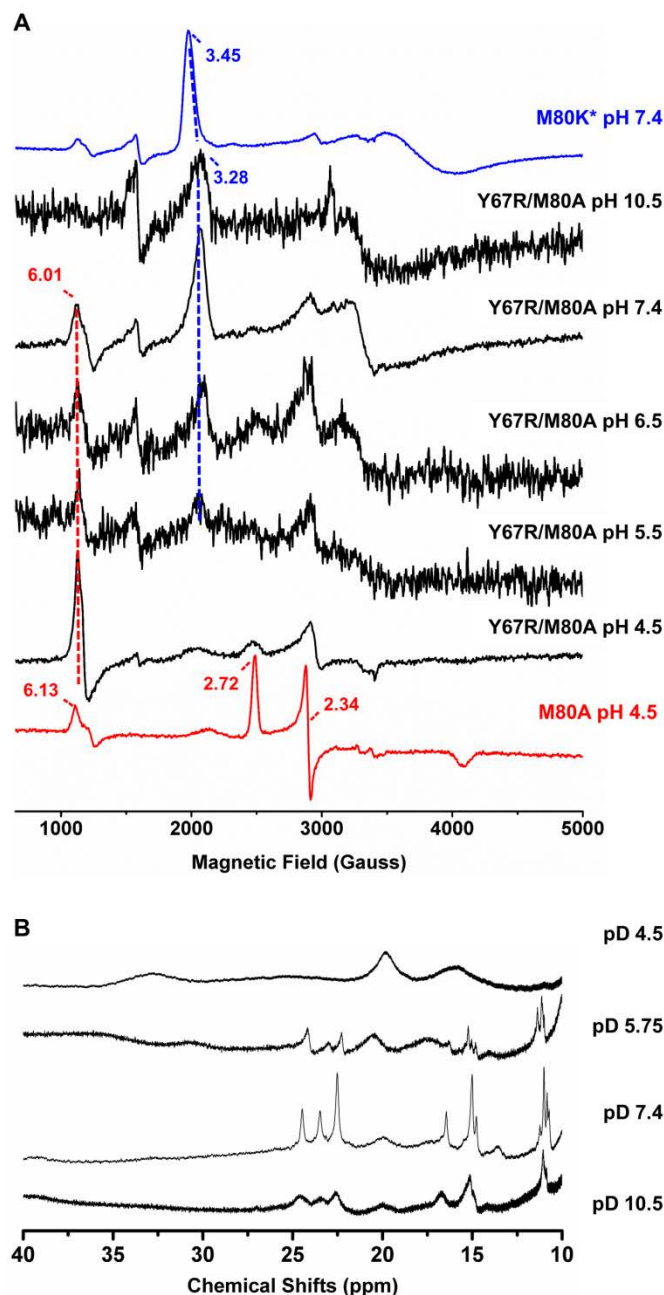

**Figure S10.** (A) EPR spectra of yeast iso-1 K73A/K79G/M80K cyt *c* pH 7.4; horse heart Y67R/M80A cyt *c* at pH 10.5, pH 7.4, pH 6.5, pH 5.5, and pH 4.5; horse heart M80A cyt *c* pH 4.5. Each sample contained 200-300  $\mu$ M protein in 50 mM borate buffer, pH 10.5; sodium phosphate buffer, pH 7.4-6.5; MES buffer, pH 5.5; sodium acetate buffer, pH 4.5, with 20% v/v glycerol (except for K73A/K79G/M80K). Spectra were obtained at 10 K. Signals attributed to Lys-bound and high-spin H<sub>2</sub>O species are labeled in *blue* and *red*, respectively. (B) pH dependence of the downfield region of the <sup>1</sup>H NMR spectra of ferric Y67R/M80A at 25 °C. Buffers were 50 mM sodium acetate, pD 4.5-5.75; 50 mM sodium phosphate, pD 7.4; 50 mM sodium borate, pD 10.5.

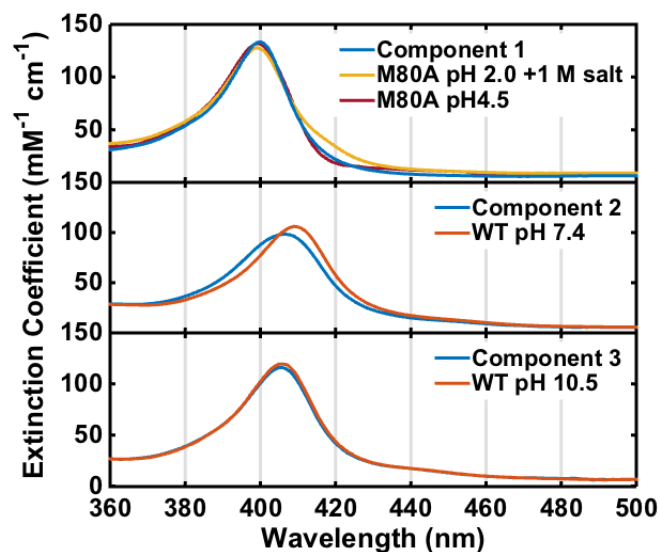

**Figure S11.** Spectra of H<sub>2</sub>O-ligated M80A at pH 2.0 with 1 M salt and at pH 4.5, Met-ligated native WT at pH 7.4 and Lys-ligated WT at pH 10.5 at  $22 \pm 2$  °C are compared with the three components obtained by input-independent SVD analysis of the T49V spectra.

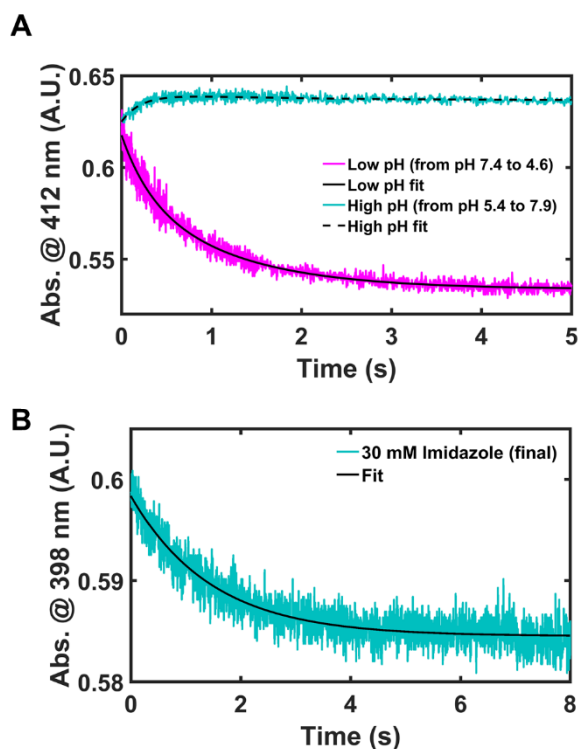

**Figure S12.** Representative kinetic traces (shown are results for Y67R/M80A) from (A) pH jumps from pH 7.4 to 4.6 and from pH 5.4 to 7.9 and (B) measurements of imidazole binding kinetics at pH 7.4. Mixing experiments were performed at  $22 \pm 2$  °C.

## SI References

- (1) Moore, G. R.; Pettigrew, G. W. *Cytochromes c: Evolutionary, structural, and physicochemical aspects*; Springer-Verlag: New York, 1990.
- (2) Saigo, S. (1981) Kinetic and equilibrium studies of alkaline isomerization of vertebrate cytochromes-C, *Biochim. Biophys. Acta* 669, 13-20.
- (3) Maity, H.; Rumbley, J. N.; Englander, S. W. (2006) Functional role of a protein foldon - An Omega-Loop foldon controls the alkaline transition in ferricytochrome *c*, *Proteins-Struct. Funct. Bioinformatics* 63, 349-355.
- (4) Wallace, C. J. A.; Mascagni, P.; Chait, B. T.; Collawn, J. F.; Paterson, Y.; Proudfoot, A. E. I.; Kent, S. B. H. (1989) Substitutions engineered by chemical synthesis at 3 conserved sites in mitochondrial cytochrome-C - thermodynamic and functional consequences, *J. Biol. Chem.* 264, 15199-15209.
- (5) Pearce, L. L.; Gartner, A. L.; Smith, M.; Mauk, A. G. (1989) Mutation-induced perturbation of the cytochrome-C alkaline transition, *Biochemistry* 28, 3152-3156.
- (6) Schejter, A.; Koshy, T. I.; Luntz, T. L.; Sanishvili, R.; Vig, I.; Margoliash, E. (1994) Effects of mutating Asn-52 to isoleucine on the heme-linked properties of cytochrome-C, *Biochem. J.* 302, 95-101.
- (7) Pollock, W. B. R.; Rosell, F. I.; Twitchett, M. B.; Dumont, M. E.; Mauk, A. G. (1998) Bacterial expression of a mitochondrial cytochrome *c*. Trimethylation of Lys72 in yeast *iso-1*-cytochrome *c* and the alkaline conformational transition, *Biochemistry* 37, 6124-6131.
- (8) Rosell, F. I.; Ferrer, J. C.; Mauk, A. G. (1998) Proton-linked protein conformational switching: Definition of the alkaline conformational transition of yeast *iso-1*-ferricytochrome *c*, *J. Am. Chem. Soc.* 120, 11234-11245.
- (9) Baddam, S.; Bowler, B. E. (2006) Mutation of asparagine 52 to glycine promotes the alkaline form of *iso-1*-cytochrome *c* and causes loss of cooperativity in acid unfolding, *Biochemistry* 45, 4611-4619.
- (10) McClelland, L. J.; Bowler, B. E. (2016) Lower protein stability does not necessarily increase local dynamics, *Biochemistry* 55, 2681-2693.
- (11) Rosell, F. I.; Harris, T. R.; Hildebrand, D. P.; Dopner, S.; Hildebrandt, P.; Mauk, A. G. (2000) Characterization of an alkaline transition intermediate stabilized in the Phe82Trp variant of yeast *iso-1*-cytochrome *c*, *Biochemistry* 39, 9047-9054.
- (12) Silkstone, G. G.; Cooper, C. E.; Svistunenko, D.; Wilson, M. T. (2005) EPR and optical spectroscopic studies of Met80X mutants of yeast ferricytochrome *c*. Models for intermediates in the alkaline transition, *J. Am. Chem. Soc.* 127, 92-99.

- (13) Black, K. M.; Wallace, C. J. A. (2007) Probing the role of the conserved beta-II turn Pro-76/Gly-77 of mitochondrial cytochrome *c*, *Biochem. Cell. Biol.* *85*, 366-374.
- (14) Nall, B. T.; Zuniga, E. H.; White, T. B.; Wood, L. C.; Ramdas, L. (1989) Replacement of a conserved proline and the alkaline conformational change in *iso*-2-cytochrome-*c*, *Biochemistry* *28*, 9834-9839.
- (15) Ying, T. L.; Zhong, F. F.; Xie, J.; Feng, Y. J.; Wang, Z. H.; Huang, Z. X.; Tan, X. S. (2009) Evolutionary alkaline transition in human cytochrome *c*, *J. Bioenerg. Biomemb.* *41*, 251-257.
- (16) Josephs, T. M.; Liptak, M. D.; Hughes, G.; Lo, A.; Smith, R. M.; Wilbanks, S. M.; Bren, K. L.; Ledgerwood, E. C. (2013) Conformational change and human cytochrome *c* function: mutation of residue 41 modulates caspase activation and destabilizes Met-80 coordination, *J. Biol. Inorg. Chem.* *18*, 289-297.
- (17) Goldes, M. E.; Jeakins-Cooley, M. E.; McClelland, L. J.; Mou, T. C.; Bowler, B. E. (2016) Disruption of a hydrogen bond network in human versus spider monkey cytochrome *c* affects heme crevice stability, *J. Inorg. Biochem.* *158*, 62-69.
- (18) Garcia-Heredia, J. M.; Diaz-Quintana, A.; Salzano, M.; Orzaez, M.; Perez-Paya, E.; Teixeira, M.; De la Rosa, M. A.; Diaz-Moreno, I. (2011) Tyrosine phosphorylation turns alkaline transition into a biologically relevant process and makes human cytochrome *c* behave as an anti-apoptotic switch, *J. Biol. Inorg. Chem.* *16*, 1155-1168.
- (19) Garcia-Heredia, J. M.; Diaz-Moreno, I.; Nieto, P. M.; Orzaez, M.; Kocanis, S.; Teixeira, M.; Perez-Paya, E.; Diaz-Quintana, A.; De la Rosa, M. A. (2010) Nitration of tyrosine 74 prevents human cytochrome *c* to play a key role in apoptosis signaling by blocking caspase-9 activation, *Biochim. Biophys. Acta Bioenerg.* *1797*, 981-993.
- (20) Caffrey, M. S.; Cusanovich, M. A. (1994) Site-specific mutagenesis studies of cytochromes-*C*, *Biochim. Biophys. Acta Bioenerg.* *1187*, 277-288.
- (21) Koshy, T. I.; Luntz, T. L.; Schejter, A.; Margoliash, E. (1990) Changing the invariant proline-30 of rat and *Drosophila melanogaster* cytochromes *c* to alanine or valine destabilizes the heme crevice more than the overall conformation, *Proc. Natl. Acad. Sci. USA* *87*, 8697-8701.
- (22) Feinberg, B. A.; Petro, L.; Hock, G.; Qin, W. Y.; Margoliash, E. (1999) Using entropies of reaction to predict changes in protein stability: tyrosine-67-phenylalanine variants of rat cytochrome *c* and yeast *iso*-1 cytochromes *c*, *J. Pharmaceut. Biomed.* *19*, 115-125.
- (23) Luntz, T. L.; Schejter, A.; Garber, E. A. E.; Margoliash, E. (1989) Structural significance of an internal water molecule studied by site-directed mutagenesis of tyrosine-67 in rat cytochrome *c*, *Proc. Natl. Acad. Sci. USA* *86*, 3524-3528.
